# Supplementary material for: Preparation and photoluminescence properties of yellow-emitting CuInS2/ZnS quantum dots embedded in TMAS-derived silica
Source: Royal Society of Chemistry journal article supplement (doi:10.1039/c7ra00081b), 2017-01-01
Supplement: c7ra00081b1.pdf [file c7ra00081b1.pdf]

## Electronic supplementary information

*RSC Advances*

### Preparation and Photoluminescence Properties of Yellow-Emitting CuInS<sub>2</sub>/ZnS Quantum Dots Embedded in TMAH-Derived Silica

Chikako Wada,<sup>a</sup> Yoshiki Iso,<sup>a\*</sup> Tetsuhiko Isobe<sup>a\*</sup> and Hirokazu Sasaki<sup>b</sup>

<sup>a</sup>*Department of Applied Chemistry, Faculty of Science and Technology, Keio University,*

*3-14-1 Hiyoshi, Kohoku-ku, Yokohama 223-8522, Japan*

<sup>b</sup>*SHOEI CHEMICAL INC., 2-1-1 Nishi-Shinjuku, Shinjuku-ku, Tokyo 163-0443, Japan*

\*Corresponding Authors

E-mail address: iso@aplc.keio.ac.jp (Y.I.), isobe@aplc.keio.ac.jp (T.I.);

Tel: +81 45 1558 (Y.I.), +81 45 1554 (T.I.); Fax: + 81 45 1551

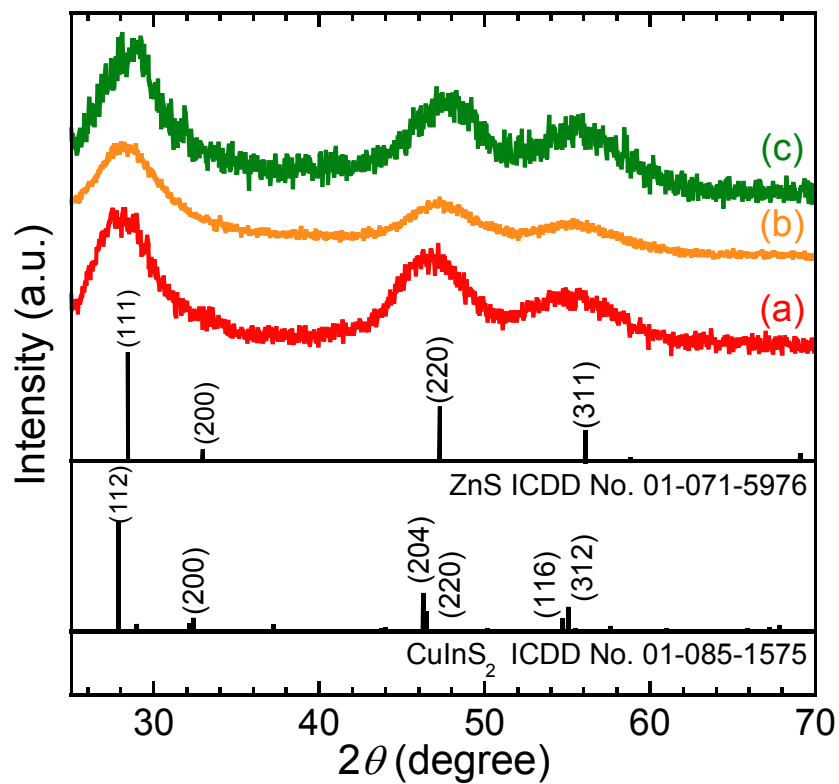

Fig. S1 XRD profiles of powder samples of (a) CIS, (b) CIS/ZnS, and (c) CIS/ZnS/ZnS QDs. ICDD card data of tetragonal-chalcopyrite-type CuInS<sub>2</sub> and zinc-blende-type ZnS are shown for comparison.

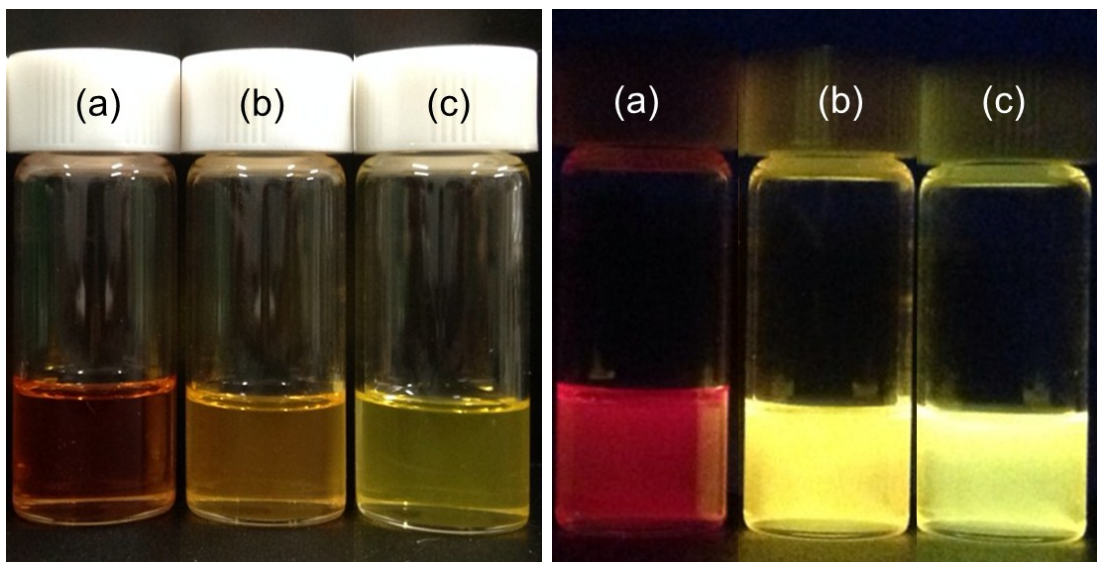

Fig. S2 Photographs of (a) CIS, (b) CIS/ZnS, and (c) CIS/ZnS/ZnS QD dispersions under white light (left) and 365 nm near-UV light.

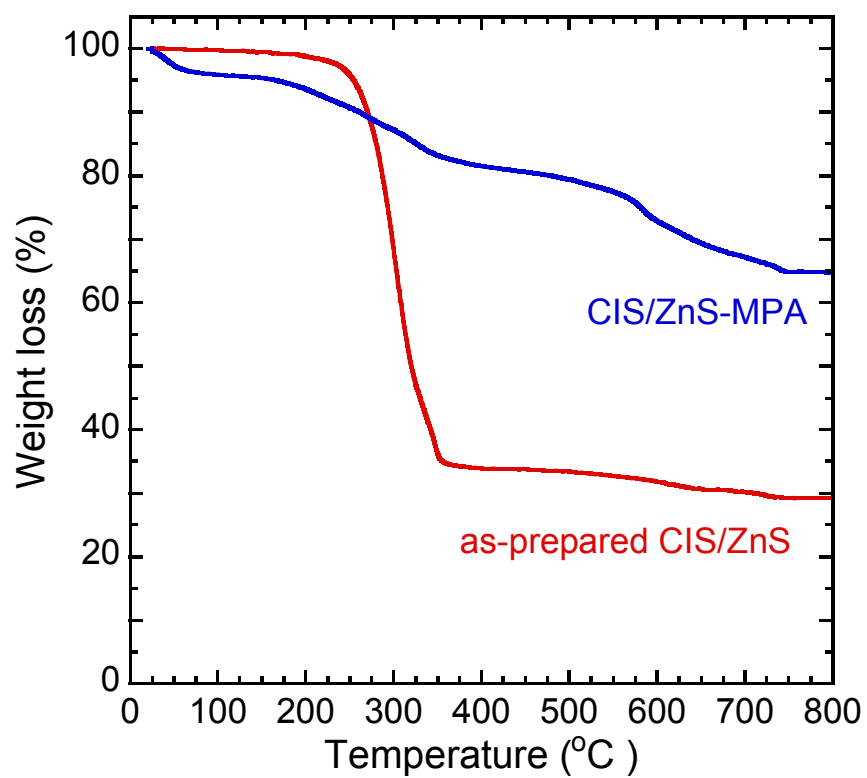

Fig. S3 TGA curves of as-prepared CIS/ZnS and CIS/ZnS-MPA QD powder samples under Ar gas flow.

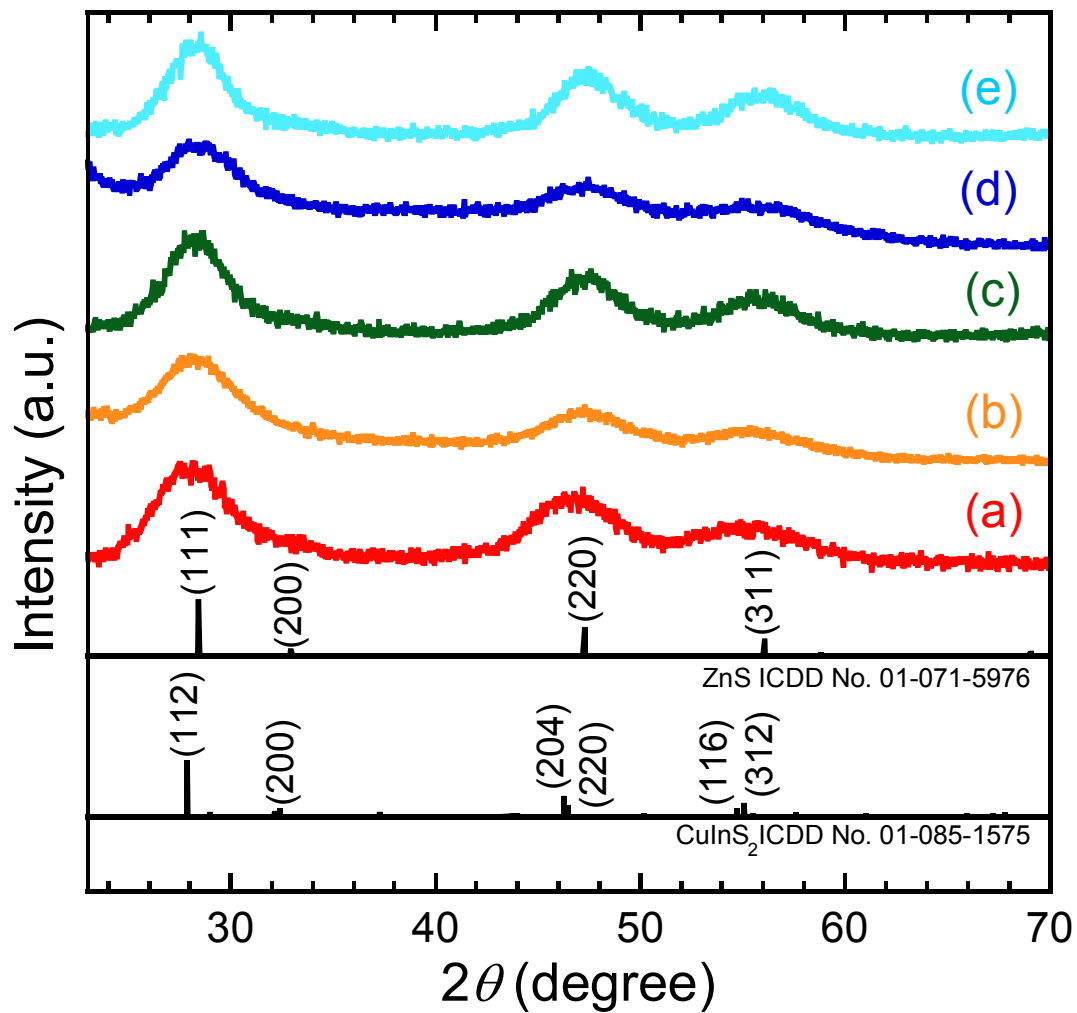

Fig. S4 XRD profiles of powder samples of (a) as-prepared CIS, (b) as-prepared CIS/ZnS, (c) CIS/ZnS-MPA, (d) as-prepared CIS/ZnS/ZnS, and (e) CIS/ZnS/ZnS-MPA QDs. ICDD card data for tetragonal-chalcopyrite CIS and zinc-blende ZnS are also shown.

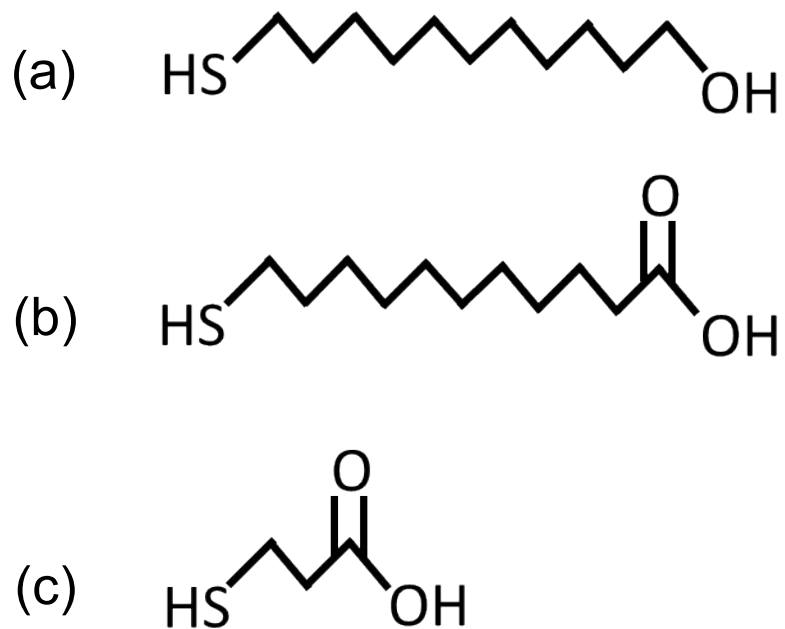

Fig. S5 Molecular structures of thiol surfactants (a) MUD, (b) MUA, and (c) MPA, used for ligand exchange upon hydrophilization.

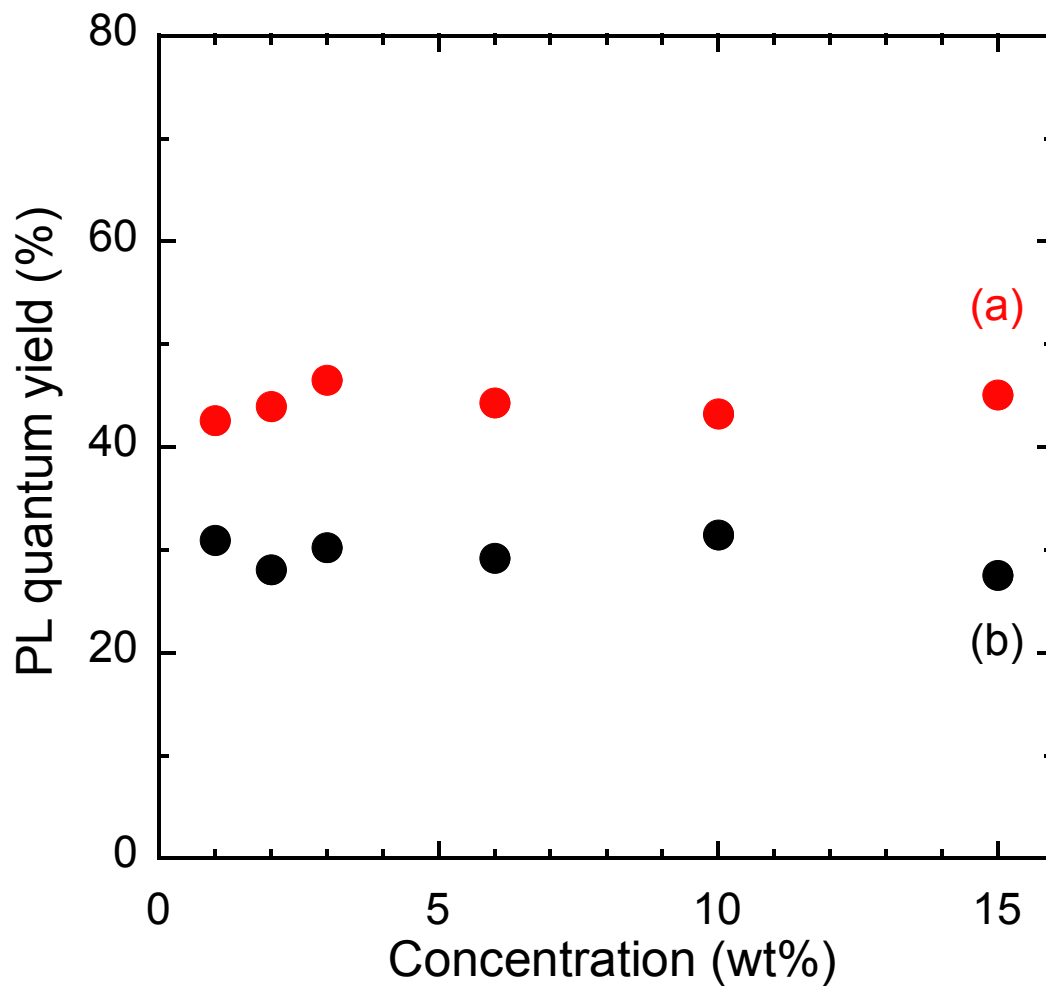

Fig. S6 Absolute QYs of TMAS-derived silica composites containing different concentrations of (a) CIS/ZnS/ZnS and (b) CIS/ZnS QDs.
